1 **Geometric Analysis of Regime Shifts in Coral Reef Communities**

2

3 Edward W. Tekwa<sup>1,2\*</sup>, Lisa C. McManus<sup>1</sup>, Ariel Greiner<sup>3</sup>, Madhavi A. Colton<sup>4</sup>, Michael S.  
4 Webster<sup>4</sup>, Malin L. Pinsky<sup>1</sup>

5

6 <sup>1</sup>Department of Ecology, Evolution, and Natural Resources, Rutgers University, NJ, USA.

7 <sup>2</sup>Department of Ecology and Evolutionary Biology, Princeton University, Princeton, NJ, USA.

8 <sup>3</sup>Department of Ecology and Evolutionary Biology, University of Toronto, Toronto, ON,  
9 Canada.

10 <sup>4</sup>Coral Reef Alliance, Oakland, CA, USA.

11

12 \*Correspondence to: Edward W. Tekwa, edtekwa@gmail.com

13 ORCID: 0000-0003-2971-6128

14

15

16 **Abstract**

17

18 Coral reefs are among the many communities believed to exhibit regime shifts between  
19 alternative stable states, single-species dominance, and coexistence. Proposed drivers of regime  
20 shifts include changes in grazing, spatial clustering, and ocean temperature. Here we distill the  
21 dynamic regimes of coral-macroalgal interaction into a three-dimensional geometry, akin to  
22 thermodynamic phase diagrams of state transitions, to facilitate analysis. Specific regime-shifting  
23 forces can be understood as bifurcation vectors through the cubic regime geometry. This  
24 geometric perspective allows us to understand multiple forces simultaneously in terms of the  
25 stability and persistence of interacting species. For example, in a coral-macroalgae community,  
26 grazing on macroalgae can lead to alternative stable states when there is no spatial clustering  
27 (e.g., high habitat connectivity). However, with spatial clustering, grazing can lead to  
28 coexistence because of elevated local intraspecific competition. The geometrical analysis of  
29 regime shifts is applicable to any two-species communities and can help conservation efforts  
navigate complexity and abrupt changes.

## 30 I. Introduction

31 Regime shifts and alternative stable states have been implicated in many communities,  
32 including coral reefs (Hughes et al. 2017), shallow lakes (Scheffer et al. 1993), kelp beds (Ling  
33 et al. 2014), and terrestrial forests (Hirota et al. 2011). Discontinuous shifts in community  
34 dynamics due to gradual environmental changes imply that conservation and management may  
35 have to anticipate and confront historical legacy traps (Scheffer et al. 2001, Tekwa et al. 2019a).  
36 The potential for regime shifts is a pressing concern in the Anthropocene, as exemplified by  
37 recent heat waves driving coral reefs to a depauperate state (Hughes et al. 2019). Coral reefs  
38 have been intensely studied and share general features with a wide range of other communities  
39 suggested to exhibit regime shifts, particularly those that feature two species whose interactions  
40 are selectively mediated by grazers, nutrients, fire, or temperature (Mumby et al. 2007, Staver  
41 and Levin 2012, Graham et al. 2015, Schmitt et al. 2019). However, there remains disagreement  
42 about the evidence for regime shifts and alternative stable states among coral reefs (Bruno et al.  
43 2009, Dudgeon et al. 2010, Mumby et al. 2013) and other communities (Schröder et al. 2005).  
44 One possible explanation for this disagreement is that there are different mechanisms leading to  
45 regime shifts even within one ecosystem type such as coral reefs (van de Leemput et al. 2016),  
46 such that empirical examinations focusing on one mechanism will yield negative results across  
47 sites.

48 In the coral reef literature, multiple regime shift mechanisms have been modelled  
49 separately, including interspecific competition among coral species, interspecific competition  
50 between coral and macroalgae, predator-prey interaction, and grazer-mediated interaction  
51 (Knowlton 1992, Mumby et al. 2007, Petraitis and Hoffman 2010, van de Leemput et al. 2016).  
52 These mechanisms hinge on space being a limiting resource for benthic coral reef communities  
53 (McCook et al. 2001, Sandin and McNamara 2012), as is evident by the common use of coral  
54 cover (maximum of 100%) in the literature (Jokiel et al. 2015). However, models that track coral  
55 cover often treat space as if it were any other limiting non-spatial resource, without explicitly  
56 incorporating spatial dynamics (Elmhirst et al. 2009, Anthony et al. 2011, Blackwood et al. 2011,  
57 Baskett et al. 2014, Fabina et al. 2015, McManus et al. 2019). However, we know from the  
58 broader ecological literature that spatial clustering, arising from low habitat connectivity or  
59 limited dispersal, can strongly determine species stability in communities even with linear  
60 interaction responses (Bolker and Pacala 1999, Chesson 2000). There is therefore a need to  
61 synthesize the variety of spatial and non-spatial mechanisms of coral reef regime shifts in general  
62 ecological terms.

63 Here we propose simple modifications to a bi-linear mathematical model (Volterra 1926,  
64 Lotka 1978, Neuhauser and Pacala 1999) so as to use generic community ecological terms to  
65 synthesize spatial, temperature, and grazing effects on coral macroalgal interactions. This model  
66 reveals the basic ingredients that lead to alternative stable states or coexistence of corals and  
67 macroalgae on coral reefs, as well as what these species stability outcomes mean for the  
68 aggregate community. We then distill the model to three parameters that completely define the  
69 possible dynamic regimes and that can be visualized as a cubic volume. We show how  
70 previously suggested bifurcating factors—such as grazing, spatial clustering, and warming—are  
71 different vectors traversing this cubic parameter space. The ultimate goal of this formalism is the  
72 identification of generic bifurcation dimensions (local competition and intrinsic growth metrics)  
73 that will allow scientists and conservation managers to generate and test hypotheses regarding  
74 the presence or absence of regime shifts without narrowly focusing on single region- or system-  
75 specific mechanisms.

## 76 II. Methods

77 We first present the Lotka-Volterra model as a foundation for two-species interactions,  
 78 then show that a coral-macroalgae model can be analyzed as a special case and extended to  
 79 incorporate temperature dependence. We then incorporate spatial clustering into the models,  
 80 arriving at a general Spatial Lotka-Volterra formulation of dynamic regimes in two-species  
 81 systems. Finally, we add temperature dependent growth. The specific spatial and temperature-  
 82 dependence introduced for coral-macroalgal interactions allow us to subsequently explore how  
 83 grazing, spatial clustering, and warming affect coral reef communities' dynamic regimes.

84

### 85 *Lotka-Volterra Model*

86

87 **Table 1. Model equations.** The dynamic equations are given in the form of  
 88  $dN_i/(N_i dt) = \sum(\text{coefficient} \times \text{state})$  where each coefficient is highlighted in orange and the  
 89 corresponding state is the bracketed variable given in the header row. Subscript  $i$  refers to the  
 90 focal species and  $j \neq i$ . All symbols are defined in Table 2.

91

| Model                  | Species (i) | Density changes                | Intrinsic rate (×1) | Intraspecific interaction (×N <sub>i</sub> ) | Interspecific interaction (×N <sub>j</sub> ) | Higher-order interspecific interaction (×(N <sub>j</sub> <sup>2</sup> +N <sub>j</sub> <sup>3</sup> +...)) |
|------------------------|-------------|--------------------------------|---------------------|----------------------------------------------|----------------------------------------------|-----------------------------------------------------------------------------------------------------------|
| Lotka-Volterra         | 1           | $\frac{dN_1}{N_1 dt} = \Sigma$ | $r_1 - m_1$         | $-r_1 a_{11}$                                | $-r_1 a_{12}$                                | 0                                                                                                         |
|                        | 2           | $\frac{dN_2}{N_2 dt} = \Sigma$ | $r_2 - m_2$         | $-r_2 a_{22}$                                | $-r_2 a_{21}$                                | 0                                                                                                         |
| Mumby model            | 1 coral     | $\frac{dN_1}{N_1 dt} = \Sigma$ | $r - d$             | $-r$                                         | $-(r + a)$                                   | 0                                                                                                         |
|                        | 2 algae     | $\frac{dN_2}{N_2 dt} = \Sigma$ | $\gamma - g$        | $-\gamma$                                    | $-(\gamma + g - a)$                          | $-g$                                                                                                      |
| Spatial Lotka-Volterra | 1           | $\frac{dN_1}{N_1 dt} = \Sigma$ | $r_1 - m_1$         | $-r_1 a_{11} C_{11}$                         | $-r_1 a_{12} C_{12}$                         | 0                                                                                                         |
|                        | 2           | $\frac{dN_2}{N_2 dt} = \Sigma$ | $r_2 - m_2$         | $-r_2 a_{22} C_{22}$                         | $-r_2 a_{21} C_{12}$                         | 0                                                                                                         |

92

93 We first restate the classic two-species competitive Lotka-Volterra equations and their  
 94 well-known implications for bistability and coexistence (Volterra 1926, Lotka 1978). The  
 95 species in these equations can represent coral and macroalgae. The Lotka-Volterra model  
 96 assumes that each species has intrinsic growth rate ( $r_i$ ) and mortality ( $m_i$ ). In addition,  
 97 competition between species  $i$  and  $j$  results in linear per-capita growth rate changes ( $-r_i a_{ij}$ ) that  
 98 scale with the density of the other species ( $N_j$ ) (Table 1). There are three non-trivial equilibria  
 99 sets, including species 1 dominance (case 1), species 2 dominance (case 2), and coexistence  
 100 (Table A1). Stability analysis (Appendix: Lotka-Volterra Model) shows that the single-species  
 101 equilibrium for species  $i$  is stable if:

102 Equation 1 
$$\frac{a_{ji}}{a_{ii}} > \left( \frac{r_j - m_j}{r_j} \right) / \left( \frac{r_i - m_i}{r_i} \right)$$

103 That is, if the ratio of interspecific competition (of species  $j$  on  $i$ ,  $a_{ji}$ ) over intraspecific  
 104 competition (of  $i$ ,  $a_{ii}$ ) is greater than the ratio of species  $j$ 's isolated equilibrium density ( $(r_j -$   
 105  $m_j)/r_j$ ) over species  $i$ 's isolated equilibrium density ( $(r_i - m_i)/r_i$ ) (when intraspecific competitions  
 106 are equal,  $a_{11} = a_{22}$ ), then the dominance of species  $i$  (with  $j$  locally extirpated) is stable. If the

107 condition in Equation 1 is true for only  $i=1$  but not  $i=2$ , then species 1 competitively excludes  
 108 species 2 deterministically, and vice versa for species 2 competitively excluding species 1. If the  
 109 condition is false for both species, then coexistence is stable. However, if Equation 1 is true for  
 110  $i=1$  and for  $i=2$ , then coexistence is unstable and alternative stable states occur, with either  
 111 species dominating depending on initial conditions.

112

113 **Table 2. Symbol definitions.** Parameter values are for Figures 2-4.

| Definition                                                                      | Species 1 (coral)<br>parameter values     | Species 2 (macroalgae)<br>parameter values     |
|---------------------------------------------------------------------------------|-------------------------------------------|------------------------------------------------|
| <b><i>Coral-Macroalgae Model</i></b> (without spatial + temperature dependence) |                                           |                                                |
| macroalgal overgrowth on coral                                                  | $a=1.1$                                   |                                                |
| coral mortality                                                                 | $d=0.5$                                   |                                                |
| grazing rate                                                                    |                                           | $g=[0.55 - 0.85]$                              |
| birth rate                                                                      | $r=1$                                     | $\gamma = 1.1$                                 |
| <b><i>Lotka-Volterra Equivalent</i></b> (with spatial + temperature dependence) |                                           |                                                |
| intraspecific interaction effect                                                | $a_{11}=C_{ii}$                           | $a_{22}=C_{ii}$                                |
| interspecific interaction effect                                                | $a_{12}=(r_1+a)C_{12}/r_1$                | $a_{21}=(r_2+g-a)C_{12}/r_2$                   |
| relative (intra-to-inter) clustering                                            | $C_{ii}/C_{ij}=[1, 2, 4]$                 |                                                |
| intraspecific clustering                                                        | $C_{ii}=[1, 1.19, 1.41]$                  |                                                |
| mortality                                                                       | $m_1=d$                                   | $m_2=g$                                        |
| density or cover                                                                | $0 \leq N_i \leq 1$                       |                                                |
| intrinsic growth rate                                                           | $r \cdot \exp(-\Delta T^2/(2\sigma_1^2))$ | $\gamma \cdot \exp(-\Delta T^2/(2\sigma_2^2))$ |
| thermal tolerance                                                               | $\sigma_1=1$                              | $\sigma_1=\sqrt{2}$                            |
| actual - optimal temperature                                                    | $\Delta T=[0, 1]$                         |                                                |

114

115

116 ***Coral-Macroalgae Model***

117 We next we show that models based on the Lotka-Volterra formulation can help  
 118 understand competitive exclusion, bistability, and coexistence conditions in prominent coral-  
 119 macroalgae models. The Mumby model (Mumby et al. 2007) and related models (Li et al. 2014)  
 120 consider coral ( $N_1$ ) and macroalgal ( $N_2$ ) cover. These models exhibit bistability when an implicit  
 121 herbivore's grazing rate on macroalgae ( $g$ ) is at an intermediate value. The Mumby model can be  
 122 rewritten in Lotka-Volterra form, with terms arranged according to intraspecific and interspecific  
 123 interactions (Table 1, Appendix: Coral-Macroalgae Model).

124 With this formulation, it becomes clear that the Mumby model is a particular  
 125 specification of the Lotka-Volterra model in which grazing reduces the intrinsic growth rate of  
 126 and increases the interspecific competition on macroalgae. This formulation also reveals the  
 127 implicit assumptions about competition, namely that interspecific competition is greater than  
 128 intraspecific competition for corals under any grazing rate. Interspecific competition is also  
 129 greater than intraspecific competition for macroalgae when grazing rate is sufficiently high  
 130 (Appendix, Table 1). Thus, the alternative stable states observed in the model can be understood  
 131 in terms of the Lotka-Volterra terminology of interspecific versus intraspecific competition  
 132 (Equation 1).

133 In addition, the Mumby model features a negative grazing effect on macroalgae that  
134 increases in magnitude geometrically with coral cover ( $N_1^2 + N_1^3 + \dots + N_1^\infty$ ) (Appendix, Table 1).  
135 Dropping these higher-order interactions shrinks but does not eliminate the bistable region and,  
136 in fact, the alternative stable states remain identical (Figure A1, Equation 10, see Table 2 for  
137 parameter values). Therefore, the Lotka-Volterra model appears sufficiently nuanced to represent  
138 alternative stable state dynamics between coral and macroalgae.

139 We note that Lotka-Volterra-based models traditionally define species state ( $N_i$ ) as  
140 density (biomass or abundance per area), while the coral literature tracks proportion of habitat  
141 covered by biomass (maximum of one or 100%) (Jokiel et al. 2015). Given any arbitrary area  
142 unit, density in the Lotka-Volterra model can also be set to a maximum of one both locally and  
143 globally by adjusting the competition coefficients  $a_{ij}$ . Thus, density and percent cover are  
144 interchangeable for the subsequent results.

145 Having established the connection between the Lotka-Volterra model and the Mumby  
146 model, we now proceed to incorporate space into the Lotka-Volterra model.

147

148

### 149 ***Spatial Lotka-Volterra Model***

150 Spatial competition is an implicit assumption in the coral-macroalgal interaction  
151 (McCook et al. 2001, Sandin and McNamara 2012). Here we explicitly consider how spatial  
152 dynamics affect coral and macroalgae using the Lotka-Volterra formulation. The Lotka-Volterra  
153 model can be changed into a spatial version using the spatial moment framework (Durrett and  
154 Levin 1994, Bolker and Pacala 1999, Lion and Baalen 2008, Tekwa et al. 2015). According to  
155 the spatial moment framework, interaction neighbour densities for a focal species  $i$  in a non-  
156 spatial model ( $N_j$ ) can be replaced by the local density  $N_{ij}$ , or  $C_{ij}N_j$  (related to the second spatial  
157 moment, see Appendix) where  $C_{ij}$  is a continuous-space clustering coefficient. This clustering  
158 coefficient is relevant across a variety of ways of thinking about space, including continuous  
159 space (with neighbours weighted by distance), discrete space such as habitat networks or  
160 metacommunities (with neighbours being within a patch), or social networks (with neighbours  
161 being connected nodes) (Lion and Baalen 2008, Tekwa et al. 2017).  $N_{ij}$  or  $C_{ij}N_j$  expresses the  
162 average number of species  $j$  neighbours that an individual of species  $i$  interacts with per area per  
163 time, and can be different from  $N_j$ , the average number of neighbours that an individual would  
164 interact with if all were randomly distributed or if the interaction neighbourhood were the entire  
165 community (Figure 1). In network terminology with two species,  $N_{ii}$  is the average node degree  
166 in the within-species network, whereas  $N_{ij}$  ( $i \neq j$ ) is the average node degree in the bipartite  
167 network (where the links are between species).

168 The clustering coefficient is convenient because it captures spatial clustering effects as a  
169 single multiplicative factor, indicating how many more (when  $C_{ij} > 1$ ) or fewer (when  $C_{ij} < 1$ ) times  
170 an individual of species  $i$  encounters an individual of species  $j$  than the global density of  $j$ . The  
171 higher the value of  $C_{ij}$ , the more clustered  $j$  is around  $i$ . This also allows one to write an  
172 interaction effect on population growth rate ( $dN_i/N_i dt$ ) as  $a_{ij}C_{ij}N_j$ . In this form, it is clear that the  
173 dynamic equations are the same as the non-spatial Lotka-Volterra equations, with interaction  
174 coefficients  $a_{ij}$  replaced by  $a_{ij}C_{ij}$ . That is, spatial clustering scales up the effective interaction  
175 effects. By definition,  $C_{ij} = C_{ji}$  (Tekwa et al. 2015). Spatial clustering can be due to either  
176 endogenous (low dispersal and pattern formation) or exogenous (habitat connectivity and matrix  
177 constraint) processes. In particular, low dispersal leads to  $C_{ij}$  being greater than one within  
178 species ( $C_{ii} > 1$ ) and less than one between species ( $C_{ij} < 1$ ) because offspring tend to be near

179 parents (Bolker and Pacala 1999, Lion and Baalen 2008, Tekwa et al. 2019b). Here we assume  
 180 that clustering is constant through time and ignore possible dependency on  $N_i$  or higher moments  
 181 (Bolker and Pacala 1999). Among species or morphs that are very similar, as in an incremental  
 182 evolutionary process without population size dynamics, it has been shown that relative clustering  
 183 ( $C_{ii}/C_{ij}$ ) is constant (Tarnita et al. 2009, Nathanson et al. 2009, Tekwa et al. 2015). In the more  
 184 general ecological case where species can be very different, more habitat connectivity or higher  
 185 movement rates are still expected to create less relative clustering (approaching one with the  
 186 highest connectivity or movement rates) (Bolker and Pacala 1997, Tarnita et al. 2009, Tekwa et  
 187 al. 2019b). Thus, the constant clustering assumption is an approximation that should roughly  
 188 capture spatial effects on regime dynamics.

189 Spatial clustering affects coral and macroalgal competition terms under the Spatial Lotka-  
 190 Volterra framework. By matching terms in the Spatial Lotka-Volterra model and the coral-  
 191 macroalgae model (Table 1), we find that intraspecific competition is 1 without spatial  
 192 clustering, and increases with within-species clustering ( $C_{ii}$ , Table 2). Interspecific competition  
 193 effects, on the other hand, are moderated by both space ( $C_{ij}$ , Table 2).

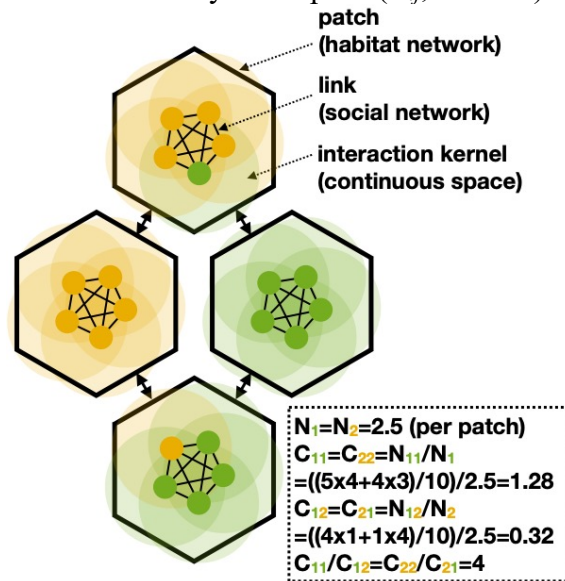

194  
 195 **Figure 1. Descriptions of spatial clustering.** The spatial clustering of individuals (circles) of  
 196 two species can be conceptualized in three different ways. First, patches (hexagons) in a habitat  
 197 network can delimit which individuals are interaction neighbours. Second, links (thin lines) in a  
 198 social network can specify which pair of individuals interact at a given time. Third, interaction  
 199 kernels (circular shades) can weigh individuals within a certain distance as neighbours. The  
 200 spatial clustering discussed in the main text can be described under any of these three  
 201 frameworks with continuous-space clustering coefficients  $C_{ij}$ . These coefficients can be tallied in  
 202 terms of the average number of neighbours (or node degree)  $j$  that  $i$  experiences ( $N_{ij}$ ) and the  
 203 global average number of individuals  $i$  per area or patch ( $N_i$ ). Sample calculations of  $N_i$ ,  $N_{ij}$ ,  $C_{ij}$ ,  
 204 and relative clustering ( $C_{ii}/C_{ij}$ ) are obtained by taking averages and ratios of individual and  
 205 neighbour counts (see box).  
 206

207 With spatial considerations the stability criterion for species  $i$  dominance becomes:

208 Equation 2 
$$\frac{c_{ij}a_{ji}}{c_{ii}a_{ii}} > \left( \frac{r_j - m_j}{r_j} \right) / \left( \frac{r_i - m_i}{r_i} \right)$$

209 This inequality is harder to attain when relative clustering ( $C_{ii}/C_{ij}$ ) is high. Thus,  
210 clustering can lead to global coexistence, even when locally there tends to be one or the other  
211 species dominating. The finding is congruent with the well-known hypothesis that spatial  
212 variation promotes coexistence (Chesson 2000).

213

### 214 *Temperature Dependence*

215 Warming is recognized as one of the most dramatic factors affecting coral reefs (Hughes  
216 et al. 2019). As a simple and analytically tractable way to consider temperature, we assume that  
217 intrinsic growth rates  $r_i$  are maximal when temperature matches the historical temperature ( $r$  for  
218 corals and  $\gamma$  for macroalgae), and that growth rates decrease when temperature deviates from  
219 these optima according to (non-standardized) Gaussian functions. A species' thermal tolerance is  
220 the standard deviations of the Gaussian function. Further, we assume that macroalgae have a  
221 wider thermal tolerance ( $\sigma_1$ ) than corals ( $\sigma_2$ , Table 2). Mortality rates are assumed constant in  
222 temperature for corals ( $d$ ) and for macroalgae ( $g$ ).

223

224

### 225 **III. Results**

226 We use stability criteria in the spatial Lotka-Volterra model to show how dynamic  
227 regimes in two-species (e.g., coral-macroalgal) communities can be generically described using  
228 simple geometry with only three parameters for competition and growth. We then show how the  
229 effects of grazing, spatial clustering, and warming translate to changes in these three competition  
230 and growth parameters to affect dynamic outcomes in the coral-macroalgal system. We aim to  
231 show that diverse mechanisms of community regime shifts can be synthesized under a common,  
232 low-dimensional geometric framework.

233

### 234 *Geometry of Dynamic Regimes*

235 The community dynamic regimes of a two-species spatial Lotka-Volterra model are  
236 determined by two inequalities involving three parameters. From Equation 2, the three  
237 parameters are 1) the local species 1 intra-to-interspecific cross competition ratio  $\alpha_1$ ; 2) the local  
238 species 2 intra-to-interspecific cross competition ratio  $\alpha_2$ ; and 3) the intrinsic growth inequality  
239 ratio between species 2 and 1,  $f_{21}$  (see Table 3). The competition ratios are called “cross  
240 competition”, because they are ratios of the intraspecific competition effect on the focal species  
241 relative to the interspecific competition effect on the other species. Competition ratios also  
242 encapsulate the effect of spatial clustering, which is positive and multiplicative. Table 3 shows  
243 that the possible combinations of inequalities produce the four dynamic regimes of alternative  
244 stable states, species 1 only, species 2 only, and coexistence. The points where the three  
245 parameters coincide ( $1/\alpha_1 = \alpha_2 = f_{21}$ ), for example at  $\alpha_1 = \alpha_2 = f_{21} = 1$ , are “quadruple points” where the  
246 four dynamic regimes collide (named after the triple point in the thermodynamic phases of solid,  
247 liquid, and gas) (Maxwell and Harman 1990). Some illustrative bifurcation calculations are  
248 shown in Table A2 and Table A3 to demonstrate that increases in relative clustering shift  
249 dynamics from “alternative stable states” to “species 2 only” and eventually to “coexistence.”  
250 Similarly, increases in grazing shifts the dynamics from “species 2 only” to “alternative stable  
251 states” to “species 1 only.”

252

253

254

255 **Table 3. Conditions for each community dynamic regime.** The variables that determine  
 256 dynamic regimes are 1) intra-to-interspecific cross competition ratio  $\alpha_1 = \frac{c_{11}a_{11}}{c_{21}a_{21}}$ , 2) intra-to-  
 257 interspecific cross competition ratio  $\alpha_2 = \frac{c_{22}a_{22}}{c_{12}a_{12}}$ , and 3) intrinsic growth inequality  
 258  $f_{21} = \left(\frac{r_2 - m_2}{r_2}\right) / \left(\frac{r_1 - m_1}{r_1}\right)$ .

| Conditions                       | Community Dynamic Regimes |
|----------------------------------|---------------------------|
| $1/\alpha_1 > f_{21} > \alpha_2$ | alternative stable states |
| $1/\alpha_1 > f_{21} < \alpha_2$ | species 1 only            |
| $1/\alpha_1 < f_{21} > \alpha_2$ | species 2 only            |
| $1/\alpha_1 < f_{21} < \alpha_2$ | coexistence               |

259  
 260

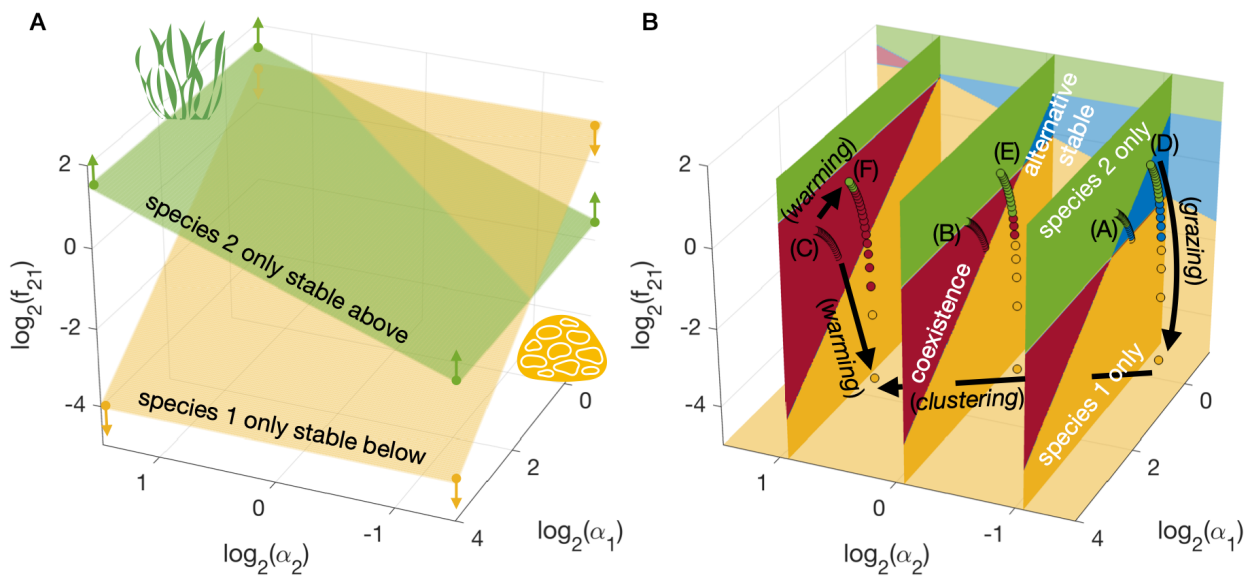

261  
 262 **Figure 2. Geometric representation of the relationship between Lotka-Volterra parameters**  
 263 **and the four possible dynamic regimes.** The dimensions are the species 1 intra-to-interspecific  
 264 cross-competition log-ratio ( $\log_2(\alpha_1)$ ), the species 2 cross-competition log-ratio ( $\log_2(\alpha_2)$ ), and  
 265 the intrinsic growth log-inequality of species 2 over species 1 ( $\log_2(f_{21})$ ). (A) The two-species  
 266 spatial Lotka-Volterra model's dynamic regimes are separated by two planes that define the  
 267 marginal stability of each species' dominance. These planes bisect each other and create four  
 268 dynamic regimes (B), which are illustrated using three two-dimensional cross-sections (colored  
 269 regimes with white text). Bifurcation vectors (black arrows and text) show the effects of grazing,  
 270 warming, and spatial clustering. Letters A-F corresponding to subplots in Figure 3. Series of  
 271 circles colored by regimes represent how equidistant increments in grazing in a coral-macroalgae  
 272 model traverse the regime geometry. The series start at three different and fixed spatial clustering  
 273 and two warming levels.

274

275 The three parameters constitute the coordinates in which the stability of each species can  
 276 change. The planes  $1/\alpha_1 = f_{21}$  and  $f_{21} = \alpha_2$  bisect, respectively, regions where species 1 and species  
 277 2 dominance are marginally stable. In particular, in log-space these planes are flat (because all  
 278 dimensions are ratios, Figure 2A). Using these planes, we construct a volume with the three  
 279 dimensions as axes, and dynamic regime as categorical outcomes coded by color (Figure 2B).



280 This cube completely describes all possible dynamic regimes and their relationships to  
281 parameters in the spatial Lotka-Volterra model.

282 The dynamic regime geometry distills the spatial Lotka-Volterra model into three  
283 bifurcation dimensions that summarize competition and intrinsic growth properties ( $\alpha_1, \alpha_2, f_{21}$ ).  
284 This is a drastic dimensionality reduction from the original spatial Lotka-Volterra model (11  
285 dimensions:  $a_{11}, a_{12}, a_{21}, a_{22}, C_{11}, C_{12}, C_{22}, m_1, m_2, r_1, r_2$ ) and the linearized coral-macroalgal  
286 model (5 dimensions:  $a, d, g, \gamma, r$ ) (Table 1 and Table 2). The dimensionality reduction also  
287 means that there are multiple ways (multiple combinatorial changes in the original parameters) to  
288 achieve the same bifurcations. For example, equal changes to either relative clustering  $C_{11}/C_{21}$  or  
289 to the local competition ratio  $a_{11}/a_{21}$  results in the same change in  $\alpha_1$  and therefore the same  
290 sequence of regime shifts – either from coexistence to species 1 only, or from species 2 only to  
291 alternative stable states depending on  $f_{21}$  (Figure 2B).

292 We focussed here on coral-macroalgal competition, but the results in this section apply to  
293 any two species by virtue of the generic spatial Lotka-Volterra formulation.

294

### 295 *System-Specific Outcomes*

296 The categorization of dynamic regimes and dimensional reduction allow one to take a  
297 geometric approach to reasoning. Here we illustrate the utility and limitation of geometric  
298 reasoning by comparing it against species-level outcomes from a particular set of parameters. In  
299 this system, we explore how changes in grazing (Mumby et al. 2007), spatial clustering (Bolker  
300 and Pacala 1999), and warming (Hughes et al. 2019) affect dynamic regimes – quantities that  
301 should be obtainable from geometric reasoning alone. We also explore effects on coral and  
302 macroalgae covers or densities – quantities that are related to but are more specific than  
303 categorical regimes (see Table A4 for parameter values and numerical outcomes from this  
304 example).

305 First, we show how parameter changes can be represented as bifurcation vectors  
306 corresponding to the geometric coordinates of  $\alpha_1, \alpha_2$ , and  $f_{21}$  (series of circles in Figure 2B). As  
307 grazing increases, it decreases the relative growth of macroalgae versus coral ( $f_{21}$ ) and decreases  
308 the cross-competition ratio (relative intraspecific competition) for macroalgae ( $\alpha_1$ ). A major  
309 effect is to drive the system towards the lower part of Fig. 2B. In contrast, increases in spatial  
310 clustering increase the cross-competition ratios for both species ( $\alpha_1, \alpha_2$ ), driving the system  
311 towards the front left corner of Fig. 2B.

312 The effect of warming is more complicated. Warming decreases the cross-competition  
313 ratios ( $\alpha_1, \alpha_2$ ) independently from clustering and grazing. Less intuitively, warming increases the  
314 growth inequality ( $f_{21}$ ) at low grazing due to macroalgae's wider thermal tolerance, but decreases  
315 the growth inequality at high grazing where even a slight drop in  $\gamma$  pushes macroalgae closer to  
316 zero growth (see Table 1). The result is an expanded range of  $f_{21}$  values traversed by grazing  
317 variation when combined with warming.

318 We next compare coral and macroalgal cover changes (Figure 3) to corresponding regime  
319 shifts from the geometric perspective (Figure 2). Under no warming and no spatial clustering,  
320 increases in grazing transition the community from macroalgal dominance to alternative stable  
321 states to coral dominance (Figure 3A). With more clustering, macroalgal dominance is only  
322 realized at low grazing, and coexistence becomes more likely at high grazing (Figure 3B, C).  
323 With increased temperatures, grazing traverses a larger competition-growth parameter space and  
324 therefore its effects are magnified. The regions for macroalgae (at low grazing) or coral  
325 dominance (at high grazing) increase, and the regions for coexistence or alternative stable states

326 decrease (Figure 3D-F) when compared to the case with baseline temperatures (Figure 3A-C).  
 327 The geometrically predicted alternative stable states and coexistence regimes, corresponding to  
 328 cases in Figure 3A and F, are confirmed with phase diagrams where transient trajectories with  
 329 different initial conditions converge on the expected number of stable equilibria (Figure 4).  
 330

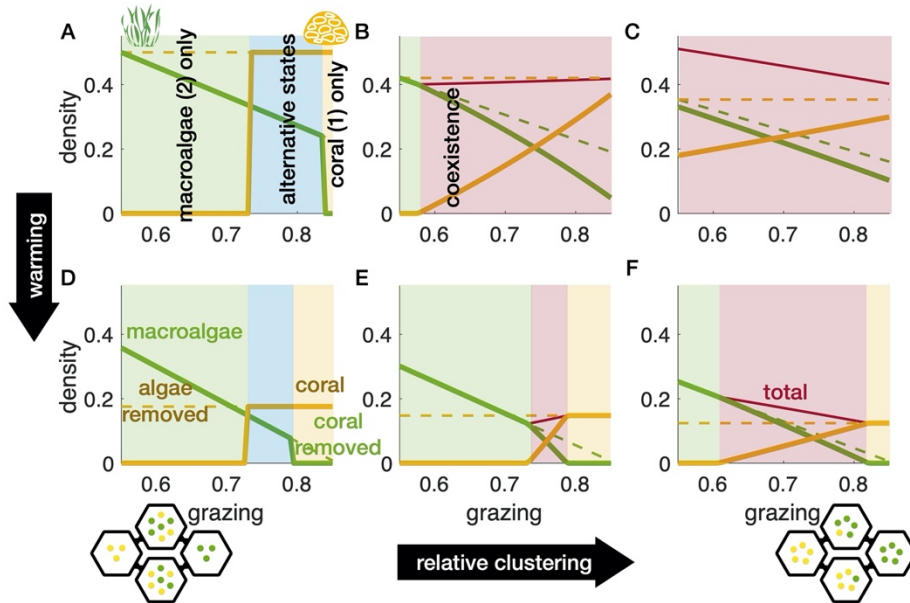

331  
 332 **Figure 3. Regime shifts and coral-macroalgal density changes driven by changes in grazing.**  
 333 Results are from the spatial Lotka-Volterra model (see Table 2 for parameterization). Plots show  
 334 macroalgal cover or density (green line), coral cover (yellow line), macroalgal or coral with the  
 335 other artificially removed (dotted lines, to contrast with coexistence effects), and total cover of  
 336 both taxa during coexistence (maroon line). (A-C) Baseline temperatures, with relative clustering  
 337 ( $C_{ii}/C_{ij}$ ) at 1, 2, or 4 (from left to right). (D-F) 1 °C warming, with relative clustering being 1, 2,  
 338 and 4. The shades indicate the regimes of macroalgal dominance (green), alternative stable states  
 339 (blue), coral dominance (yellow), and coexistence (red). Yellow and green dots in patch  
 340 diagrams at the bottom illustrate cases of low (left) versus high (right) relative clustering.

341  
 342 In summary, the outcomes for the specifically parameterized coral-macroalgae system  
 343 illustrate levels of dynamic precision that cannot be gleaned from geometric reasoning alone; but  
 344 the dynamic regime predictions from geometry remain accurate. The most detailed features of a  
 345 dynamic system – transient trajectories (Figure 4) – are only partly captured by equilibrium  
 346 analyses (Figure 3). Equilibria, or expected coral and macroalgal densities, are in turn not  
 347 captured by regime geometry (Figure 2). Nevertheless, with only three coordinates  $\alpha_1$ ,  $\alpha_2$ , and  $f_{21}$   
 348 (Figure 2 vectors and matching color codes in Figure 3 and Table A4), regime shifts caused by  
 349 multiple bifurcating forces including grazing, warming, and spatial clustering can be inferred  
 350 using geometric reasoning alone (series of circles in Figure 3B).

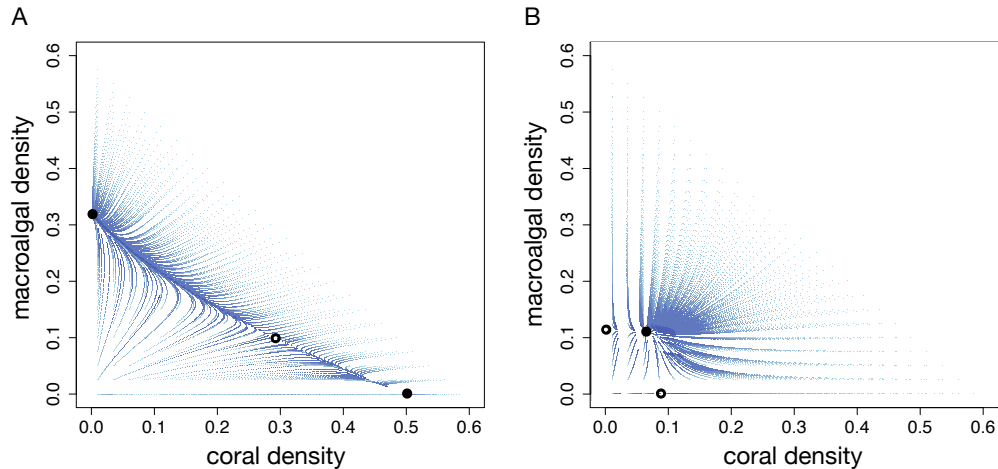

351  
352 **Figure 4. Phase diagrams of Lotka-Volterra coral-macroalgal dynamics.** Trajectories (blue)  
353 are shown for 100 time steps starting at evenly spaced initial densities, with darker colour  
354 indicating densities at later times. Filled circles are analytically derived stable equilibria, while  
355 open circles are unstable equilibria. **A.** Trajectories corresponding to baseline temperatures, no  
356 spatial clustering, and a grazing rate of 0.75 showing alternative stable states (scenario in Figure  
357 3A). **B.** Trajectories corresponding to an increased temperature, high spatial clustering, and a  
358 grazing rate of 0.75 showing coexistence (scenario in Figure 3F).

359  
360

#### 361 **IV. Discussion**

362 Regime shifts have been a focus of conservation in an era of change (Steffen et al. 2015),  
363 and coral reefs have served both as a model for understanding such shifts and as an important  
364 biome that is a focus of substantial conservation efforts (Hughes et al. 2017). Conservation  
365 efforts are, however, confounded in part by the diverse and disparate proposals for mechanisms  
366 that drive regime shifts in coral reefs (Mumby et al. 2013, van de Leemput et al. 2016, Hughes et  
367 al. 2019). Here, we provided a theoretical synthesis that captures the essential dynamics within  
368 coral reefs and other competitive communities. Further, we found that the dynamic regimes of  
369 alternative stable states, single-species dominance, and coexistence can be fully determined by  
370 only three synthetic parameters. These three parameters are a drastic dimensionality reduction,  
371 an approach that has proven useful for related studies of dynamic transitions (Jiang et al. 2018).  
372 The reduced parameter set summarizes intraspecific versus interspecific spatial competition  
373 effects ( $\alpha_1$ ,  $\alpha_2$ ), as well as intrinsic growth differences between species ( $f_{21}$ ). The three  
374 parameters form a cubic volume that allows for a geometric analysis of regime shifts.  
375 Ecologically realistic bifurcations or regime-shifting forces, such as grazing, spatial clustering  
376 changes, and warming, can be visualized as vectors through the dynamic regime cube.

377 The regime perspective produces conservation-relevant insights despite ignoring species-  
378 specific outcomes. In a coral-macroalgae system, we showed that grazing decreases the intrinsic  
379 growth difference  $f_{21}$  and moves the system away from macroalgal dominance. Warming  
380 stretches the geometric space that grazing variation traverses, thereby increasing the likelihood  
381 of either coral or macroalgae dominating. Spatial clustering on the other hand moves the system  
382 towards higher intraspecific competition relative to interspecific competition ( $\alpha_1$  and  $\alpha_2$ ), which  
383 promotes coexistence and reduces the effectiveness of grazing in inducing coral dominance.  
384 These geometric reasonings suggest that the protection of grazers will have an enhanced positive  
385 effect on coral conservation under warming in conjunction with low spatial clustering (such as,

386 for example, by maintaining habitat connectivity between reefs). In contrast, if grazer protection  
387 fails in the face of fishing pressure (Botsford et al. 1997, Costello et al. 2016, Tekwa et al.  
388 2019a), then high clustering through low habitat connectivity (e.g., from greater distance  
389 between protected areas) may actually enhance coral persistence through spatial coexistence  
390 mechanisms (Chesson 2000), although at much lower levels than if both grazers and habitat  
391 connectivity are protected. These geometric results illustrate that multiple management tools,  
392 such as controls on grazing and connectivity, can interact to produce conservation outcomes.

393 The geometry of regime shifts resembles other uses of graphical reasoning such as  
394 population growth isoclines (Tilman 1980, Knowlton 1992, McCann and Yodzis 1995) and  
395 economic phase diagrams (Gordon 1954, Solow 1956). Our approach differs due to its basis in  
396 synthetic stability criteria (see Appendix: Lotka-Volterra Model) that directly provide intuition  
397 regarding community outcomes rather than flows. The approach also focuses on how dynamic  
398 regimes shift with all possible parameter changes, in contrast to traditional Lotka-Volterra  
399 studies that often explored transient dynamics and equilibria at fixed parameterizations or  
400 variations along one parameter (Bomze 1983, Neuhauser and Pacala 1999). Regime geometry is  
401 most analogous to phase diagrams of thermodynamic states, such as the  $p$ - $v$ - $T$  (pressure-volume-  
402 temperature) diagram of a substance's transitions between solid, liquid, and gas states (van der  
403 Waals 1873, Gibbs 1873, Verwiebe 1939, Maxwell and Harman 1990). If regime geometry and  
404 thermodynamic phase diagrams are truly analogous, then dynamics deviating from the spatial  
405 Lotka-Volterra model (nonlinear terms) could appear as modified marginal planes and regime  
406 volumes in the competition-growth space. The success of thermodynamic phase diagrams for  
407 different substances has facilitated engineering advances such as the motor and refrigeration,  
408 suggesting that regime geometry can provide a boost for conservation and ecosystem engineering  
409 by moving theoretical reasoning from mathematics to a more intuitive visualization.

410 The ability to geometrically represent system-specific bifurcations in generic ecological  
411 terms allows for a synthetic understanding of a wide variety of ecological communities. Regime  
412 shifts in lakes (Scheffer et al. 1993), kelp forests (Ling et al. 2014), and terrestrial forests (Hirota  
413 et al. 2011) share both similarities and differences with coral reefs, but can all be placed within  
414 the same geometry defined by the dimensions of competition and growth. The spatial Lotka-  
415 Volterra model that the geometry represents is also testable using data from these diverse  
416 ecosystems, because it makes specific predictions about when and what kind of shifts should  
417 occur as competition and growth ratios vary. Such a cross-system empirical synthesis can  
418 potentially facilitate the exchange of diverse conservation experiences. Moreover, the geometry  
419 highlights that regime shifts (Scheffer and Carpenter 2003) should be considered more broadly to  
420 include transitions between coexistence and single-species dominance, rather than being solely  
421 associated with alternative stable states. Coral reefs (Hughes et al. 2017, Darling et al. 2019) and  
422 other ecosystems (Waters et al. 2016) face multiple stressors and perturbations simultaneously in  
423 the Anthropocene, resulting in challenging complexities unless ecological theory sheds light on  
424 their commonalities and interactions. The geometric perspective is one potential tool to distill  
425 complexity, avoid simplistic explanations, and facilitate multiple management options for  
426 conservation success.

427

428 **Acknowledgements**

429 We thank Tim Essington, Kevin McCann, Peter Mumby, Steve Palumbi, and Daniel Schindler  
430 for discussions. Research was supported by the Gordon and Betty Moore Foundation, the Nature  
431 Conservancy, a Canadian Natural Sciences and Engineering Research Council Scholarship  
432 (CGS-D), and US National Science Foundation awards OCE-1426891 and DEB-1616821.

433

434 **Author's Contributions**

435 EWT, LCM, AG, MAC, MSW, and MLP conceptualized the project, EWT and AG conducted  
436 the analyses, and all authors contributed to writing.

437

438 **Appendix**

439

440 **Lotka-Volterra Model**

441 The stability of an equilibrium set is indicated by whether the eigenvalues of the Jacobian  
 442 matrix are negative. The eigenvalues for the first case of single-species equilibrium (Table A1),  
 443 with only species  $i$  surviving, are:

444

445 Equation 3 
$$\left\{ \begin{array}{l} -(r_i - m_i) \\ r_j \left( 1 + \frac{a_{ji}}{a_{ii}} \left( \frac{m_i}{r_i} - 1 \right) \right) - m_j \end{array} \right.$$

446

447 The first line is always negative, so the sufficient and necessary condition for species  $i$   
 448 stability hinges on line two, which translates to the inequality in Equation 1.

449

450 **Coral-Macroalgal Model**

451 Mumby et al.'s model (Mumby et al. 2007) of coral cover ( $N_1$ ), algal turf cover ( $T$ ), and  
 452 macroalgae ( $N_2$ ) contains five parameters: coral birth rate ( $r$ ), coral mortality ( $d$ ), macroalgal  
 453 birth rate ( $\gamma$ ), macroalgal overgrowth rate on coral ( $a$ ), and grazing rate ( $g$ ). The model consists  
 454 of three equations:

455

456 Equation 4 
$$\frac{dN_1}{N_1 dt} = rT - d - aN_2$$

457

458 Equation 5 
$$\frac{dN_2}{N_2 dt} = aN_1 - \frac{g}{N_2 + T} + \gamma T$$

459

460 Equation 6 
$$T = 1 - N_1 - N_2$$

461

462 Turf is simply empty space from the perspective of corals and macroalgae. The solutions are:

463

464 Equation 7

465 
$$[N_1^*, N_2^*] = \begin{cases} 0, 0 \\ 1 - \frac{d}{r}, 0 \\ 0, 1 - \frac{g}{\gamma} \\ 1 - \frac{d}{r} - \left( 1 + \frac{a}{r} \right) M^*, M^* \end{cases}$$

466

467 where

$$M^* = - \frac{r \sqrt{a^4 + 2a^3r - 4ga^3 + 2a^2d\gamma + a^2r^2 - 8ga^2r + 4ga^2\gamma + 2adr\gamma - 4gar^2 + 4gar\gamma + d^2\gamma^2 + 2a^2d - ar^2 - a^2r + 2adr - 2ad\gamma - dr\gamma}}{2a(a+r)(a+r-\gamma)}$$

468

469 The dynamic equations for  $N_1$  and  $N_2$  can be written in Lotka-Volterra form. First, the  
 470 growth of coral is:

471

472 Equation 8 
$$\frac{dN_1}{N_1 dt} = r(1 - N_1 - N_2) - d - aN_2$$

473 
$$= r - d - rN_1 - (r + a)N_2$$

474

475 Clearly, interspecific competition with macroalgae ( $-r-a$ ) is stronger than intraspecific  
 476 competition within coral ( $-r$ ). In this form, it is clear that the interactions modelled are predation,  
 477 competition for empty space, and grazing. The term  $a$  is an antisymmetric predator-prey (+/-)  
 478 interaction effect between macroalgae and corals.

479 Second, the growth of macroalgae is:

480

481 Equation 9 
$$\frac{dN_2}{N_2 dt} = aN_1 - \frac{g}{N_2 + 1 - N_2 - N_1} + \gamma(1 - N_1 - N_2)$$

482 
$$= \gamma + (a - \gamma)N_1 - \frac{g}{1 - N_1} - \gamma N_2$$

483 
$$= \gamma - g - \gamma N_2 - (\gamma + g - a)N_1 - g(N_1^2 + N_1^3 + \dots)$$

484

485 The interaction is negative for macroalgae through grazing ( $g$ ) but can be positive when  
 486  $a > \gamma + g$  and  $N_1$  is low. The negative effect of coral on macroalgae is amplified at increasing  $N_1$   
 487 (through the Taylor series). In the simplified case of  $a = \gamma$ , when macroalgae overgrows corals  
 488 and turf at the same rate, the interaction with coral is simply  $-g/(1 - N_1)$  or  $-g(1 + N_1 + N_1^2 + N_1^3 + \dots)$   
 489 according to the geometric power series (when  $|N_1| < 1$ ), which is increasingly negative as  $N_1$   
 490 increases. In general, interspecific competition can be stronger than intraspecific competition  
 491 when  $g > a$ , even without higher order terms; this becomes even more likely with higher order  
 492 terms.

493 For macroalgae,  $\gamma$  is a spatial competition rate among themselves and with corals,  
 494 whereas for corals,  $r$  is the analogous spatial competition rate. Additionally, macroalgae is  
 495 removed by corals at a rate proportional to  $1/(1 - N_1)$ , although corals do not directly benefit from  
 496 this process.

497 If we drop the nonlinear terms ( $N_1^2 + N_1^3 + \dots$ ), the equilibria are, according to the Lotka-  
 498 Volterra solutions (Table 1):

499

500 Equation 10

501 
$$[N_1^*, N_2^*] = \begin{cases} 0, 0 \\ 1 - \frac{d}{r}, 0 \\ 0, 1 - \frac{g}{\gamma} \\ -\frac{ag - a\gamma + gr - d\gamma}{r\gamma \left( \frac{(a+r)(g-a+\gamma)}{r^2} - 1 \right)}, \frac{gr + \gamma(g-a+\gamma-r) - \frac{d\gamma(g-a+\gamma)}{r}}{r\gamma \left( \frac{(a+r)(g-a+\gamma)}{r^2} - 1 \right)} \end{cases}$$

502

503

### 504 Spatial Model

505 The term  $C_{ij}N_j$  is the local density of species  $j$  around species  $i$ , and can also be written as  
 506  $N_j + c_{ij}/N_i$  where  $c_{ij}$  is the average spatial covariance weighted by an interaction kernel (Bolker and  
 507 Pacala 1999). Thus,  $C_{ij} = 1 + c_{ij}/(N_i N_j)$ . Note by definition  $C_{12} = C_{21}$ . Assuming interactions only  
 508 occur within a fixed local area (an interaction kernel that takes the value of 1 within the local

509 area, and 0 everywhere else),  $c_{ij}=E[(n_i-N_i)(n_j-N_j)]$ , where  $n_i$  is the number of individuals of  
 510 species  $i$  at a location. For  $i=j$ ,  $c_{ij}$  is just the spatial variance in the number of  $i$  individuals.

511 Consider the simplified symmetric case where  $m_i=0$ ,  $C_{11}=C_{22}$ ,  $a_{11}=a_{22}$ , and  $a_{12}=a_{21}$ . Then,  
 512 the total density at coexistence is:

513 Equation 11 
$$N_T^* = \frac{2(C_{ii}a_{ii}-C_{ij}a_{ij})}{(C_{ii}^2a_{ii}^2-C_{ij}^2a_{ij}^2)}$$

514  
 515 An increase in intraspecific clustering ( $C_{ij}$ ) and a decrease in interspecific clustering ( $C_{ij}$ ),  
 516 as expected with decreased dispersal or connectivity (Bolker and Pacala 1999), would cause  $N_T^*$   
 517 to decrease. However, this total density can still be greater than the non-clustering single-species  
 518 population if:

519  
 520 Equation 12 
$$\frac{2(C_{ii}a_{ii}-C_{ij}a_{ij})}{(C_{ii}^2a_{ii}^2-C_{ij}^2a_{ij}^2)} > \frac{1}{a_{ii}}$$

521  
 522 This condition simplifies to:

523  
 524 Equation 13 
$$C_{ii} < \frac{2a_{ii}-C_{ij}a_{ij}}{a_{ii}}$$

525  
 526 Thus, intraspecific clustering should be relatively small for the stable coexisting  
 527 community to be denser than a single-species population (a positive diversity effect). A sufficient  
 528 but not necessary condition is  $C_{ii}<2$  (obtained by assuming complete segregation between  
 529 species,  $C_{ij}=0$ ). On the other hand, the stable coexistence condition in this simplified symmetric  
 530 example is (reverse of Equation 2 where the right-hand-side equals 1):

531  
 532 Equation 14 
$$\frac{C_{ii}}{C_{ij}} > \frac{a_{ij}}{a_{ii}}$$

533  
 534 This condition states that intraspecific clustering should be large relative to interspecific  
 535 clustering for stable coexistence. We obtain the condition (Equation 15) for a community's total  
 536 density to be greater than a non-clustering single-species population by joining Equation 13 and  
 537 Equation 14.

538  
 539 Equation 15 
$$2a_{ii} - C_{ij}a_{ij} > C_{ii}a_{ii} > C_{ij}a_{ij}$$

540  
 541 The relationship between interspecific and intraspecific clustering ( $C_{ij}$  vs.  $C_{ii}$ ) can be  
 542 complicated. The ratio  $C_{ij}/C_{ii}$  can be derived exactly for two-player games on graphs assuming  
 543 constant total population size (Matsuda et al. 1992, Nathanson et al. 2009), but only  
 544 approximately for population dynamics in continuous space (Bolker and Pacala 1997, 1999) as a  
 545 function of growth and movement rates. The latter framework and other simulations (Tekwa et  
 546 al. 2019b) show that intraspecific clustering characteristically increases with decreased  
 547 movement rate, while interspecific clustering decreases at a comparatively slower rate with  
 548 decreased movement rate. Thus, we assumed a characteristic relationship  $C_{ij}=C_{ii}^{-3}$ , which creates  
 549 the three relative clustering levels [1, 2, 4] and corresponding intra- [1, 1.19, 1.41] and  
 550 interspecific clustering [1, 0.59, 0.35] used for the spatial clustering bifurcation (Table 2, Figure  
 551 2, and Figure 3).



552 **Appendix Figures**  
553

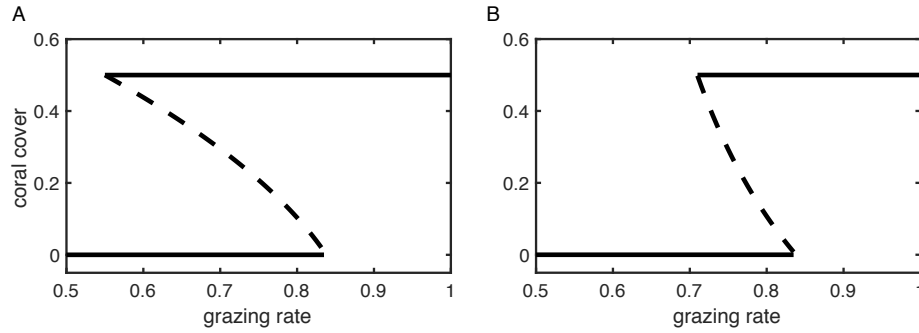

554 **Figure A1. Coral-macroalgal model solutions.** (A) The original Mumby model with non-linear  
555 coral competition affecting macroalgae. (B) A linearized Lotka-Volterra version of the Mumby  
556 model. The solid lines are analytical stable states, and the dashed curves are the unstable saddle-  
557 nodes.  
558

559 **Appendix Tables**

560

561 **Table A1. Model equilibria.** All symbols are defined in Table 2, and  $M^*$  (coexistence  
562 macroalgal cover) is given in Equation 7.

| Model                  | Species (i) | Equilibrium 1 ( $N_i^*$ )             | Equilibrium 2 ( $N_i^*$ )             | Coexistence equilibrium ( $N_i^*$ )                                                                                                                              |
|------------------------|-------------|---------------------------------------|---------------------------------------|------------------------------------------------------------------------------------------------------------------------------------------------------------------|
| Lotka-Volterra         | 1           | $\frac{r_1 - m_1}{r_1 a_{11}}$        | 0                                     | $\frac{r_1 r_2 (a_{22} - a_{12}) + a_{12} m_2 r_1 - a_{22} m_1 r_2}{r_1 r_2 (a_{11} a_{22} - a_{12} a_{21})}$                                                    |
|                        | 2           | 0                                     | $\frac{r_2 - m_2}{r_2 a_{22}}$        | $\frac{r_1 r_2 (a_{11} - a_{21}) + a_{21} m_1 r_2 - a_{11} m_2 r_1}{r_1 r_2 (a_{11} a_{22} - a_{12} a_{21})}$                                                    |
| Mumby                  | 1<br>Coral  | $1 - \frac{d}{r}$                     | 0                                     | $1 - \frac{d}{r} - \left(1 + \frac{a}{r}\right) M^*$                                                                                                             |
|                        | 2<br>Algae  | 0                                     | $1 - \frac{g}{\gamma}$                | $M^*$                                                                                                                                                            |
| Spatial Lotka-Volterra | 1           | $\frac{r_1 - m_1}{r_1 a_{11} C_{11}}$ | 0                                     | $\frac{r_1 r_2 (a_{22} C_{22} - a_{12} C_{12}) + a_{12} C_{12} m_2 r_1 - a_{22} C_{22} m_1 r_2}{r_1 r_2 (a_{11} C_{11} a_{22} C_{22} - a_{12} a_{21} C_{12}^2)}$ |
|                        | 2           | 0                                     | $\frac{r_2 - m_2}{r_2 a_{22} C_{22}}$ | $\frac{r_1 r_2 (a_{11} C_{11} - a_{21} C_{12}) + a_{21} C_{12} m_1 r_2 - a_{11} C_{11} m_2 r_1}{r_1 r_2 (a_{11} C_{11} a_{22} C_{22} - a_{12} a_{21} C_{12}^2)}$ |

563 **Table A2. Effect of clustering on two-species community outcomes.** Parameters are:  
564  $a_{ii}/a_{ji}=0.5$  (intra-to-interspecific cross-competition ratio) and  $((r_2 - m_2)/r_2)/((r_1 - m_1)/r_1)=1.5$   
565 (intrinsic growth inequality). Relative clustering is defined as intra-to-interspecific clustering  
566 ratio ( $C_{ii}/C_{ji}$ ).

| Relative clustering: ( $C_{ii}/C_{ji}$ ) | Conditions for exclusion stability: $\frac{C_{21} a_{21}}{C_{11} a_{11}} > \left(\frac{r_2 - m_2}{r_2}\right) / \left(\frac{r_1 - m_1}{r_1}\right) > \frac{C_{22} a_{22}}{C_{12} a_{12}}$ | Outcome:                  |
|------------------------------------------|-------------------------------------------------------------------------------------------------------------------------------------------------------------------------------------------|---------------------------|
| 1                                        | $2 > 1.5 > 0.5$                                                                                                                                                                           | alternative stable states |
| 2                                        | $1 \not> 1.5 > 1$                                                                                                                                                                         | species 2 only            |
| 4                                        | $0.5 \not> 1.5 \not> 2$                                                                                                                                                                   | coexistence               |

567 **Table A3. Effect of grazing on two-species community outcomes.** Parameters are:  
568  $a_{11}/a_{21}=1.33/(1+g)$ ,  $a_{22}/a_{12}=0.5$  (intra-to-interspecific cross-competition ratios), and  $((r_2 - m_2)/r_2)/((r_1 - m_1)/r_1)=(1-g)/0.66$  (intrinsic growth inequality). Species 1 and 2 correspond to coral  
569 and macroalgae, respectively. Grazing rate on macroalgae is  $g$ .  
570

| Grazing: (g) | Conditions for exclusion stability: $\frac{a_{21}}{a_{11}} > \left(\frac{r_2 - m_2}{r_2}\right) / \left(\frac{r_1 - m_1}{r_1}\right) > \frac{a_{22}}{a_{12}}$ | Outcome:                  |
|--------------|---------------------------------------------------------------------------------------------------------------------------------------------------------------|---------------------------|
| 0            | $0.75 \not> 1.5 > 0.5$                                                                                                                                        | species 2 only            |
| 0.4          | $1.05 > 0.9 > 0.5$                                                                                                                                            | alternative stable states |
| 0.8          | $1.35 > 0.3 \not> 0.5$                                                                                                                                        | species 1 only            |

571 **Table A4. Numerical outcomes of grazing bifurcations.** Low and high grazing rates under the  
 572 scenarios of no warming, warming, and a range of relative clustering (corresponding to Figure 2  
 573 and Figure 3), as well as their corresponding parameters in competition ( $\alpha_1$ ,  $\alpha_2$ ) and intrinsic  
 574 growth ( $f_{21}$ ) terms. Regime outcomes for parameter sets are shown in color (yellow=species 1 or  
 575 coral only, green=species 2 or macroalgae only, red=coexistence).

| Scenario              | low grazing ( $g=0.55$ ) |                    |                  | high grazing ( $g=0.85$ ) |                    |                  |
|-----------------------|--------------------------|--------------------|------------------|---------------------------|--------------------|------------------|
|                       | $\log_2(\alpha_1)$       | $\log_2(\alpha_2)$ | $\log_2(f_{21})$ | $\log_2(\alpha_1)$        | $\log_2(\alpha_2)$ | $\log_2(f_{21})$ |
| +0°C                  |                          |                    |                  |                           |                    |                  |
| (A) $C_{ii}/C_{ij}=1$ | 1                        | -1.1               | 0                | 0.37                      | -1.1               | -1.1             |
| (B) $C_{ii}/C_{ij}=2$ | 2                        | -0.070             | 0                | 1.4                       | -0.070             | -1.1             |
| (C) $C_{ii}/C_{ij}=4$ | 3                        | 0.93               | 0                | 2.4                       | 0.93               | -1.1             |
| +1°C                  |                          |                    |                  |                           |                    |                  |
| (D) $C_{ii}/C_{ij}=1$ | 0.64                     | -1.3               | 1.0              | 0.011                     | -1.3               | -4.5             |
| (E) $C_{ii}/C_{ij}=2$ | 1.6                      | -0.27              | 1.0              | 1.0                       | -0.27              | -4.5             |
| (F) $C_{ii}/C_{ij}=4$ | 2.6                      | 0.73               | 1.0              | 2.0                       | 0.73               | -4.5             |

576

577 **References**

578

- 579 Anthony, K. R. N., J. A. Maynard, G. Diaz-Pulido, P. J. Mumby, P. A. Marshall, L. Cao, and O.  
580 Hoegh-Guldberg. 2011. Ocean acidification and warming will lower coral reef resilience:  
581 CO<sub>2</sub> and coral reef resilience. *Global Change Biology* 17:1798–1808.
- 582 Baskett, M. L., N. S. Fabina, and K. Gross. 2014. Response Diversity Can Increase Ecological  
583 Resilience to Disturbance in Coral Reefs. *The American Naturalist* 184:E16–E31.
- 584 Blackwood, J. C., A. Hastings, and P. J. Mumby. 2011. A model-based approach to determine  
585 the long-term effects of multiple interacting stressors on coral reefs. *Ecological*  
586 *Applications* 21:2722–2733.
- 587 Bolker, B. M., and S. W. Pacala. 1999. Spatial Moment Equations for Plant Competition:  
588 Understanding Spatial Strategies and the Advantages of Short Dispersal. *American*  
589 *Naturalist* 153:575–602.
- 590 Bolker, B., and S. W. Pacala. 1997. Using Moment Equations to Understand Stochastically  
591 Driven Spatial Pattern Formation in Ecological Systems. *Theoretical Population Biology*  
592 52:179–197.
- 593 Bomze, I. M. 1983. Lotka-Volterra equation and replicator dynamics: A two-dimensional  
594 classification. *Biological Cybernetics* 48:201–211.
- 595 Botsford, L. W., J. C. Castilla, and C. H. Peterson. 1997. The Management of Fisheries and  
596 Marine Ecosystems. *Science* 277:509–515.
- 597 Bruno, J. F., H. Sweatman, W. F. Precht, E. R. Selig, and V. G. W. Schutte. 2009. Assessing  
598 evidence of phase shifts from coral to macroalgal dominance on coral reefs. *Ecology*  
599 90:1478–1484.

- 600 Chesson, P. 2000. General Theory of Competitive Coexistence in Spatially-Varying  
601 Environments. *Theoretical Population Biology* 58:211–237.
- 602 Costello, C., D. Ovando, T. Clavelle, C. K. Strauss, R. Hilborn, M. C. Melnychuk, T. A. Branch,  
603 S. D. Gaines, C. S. Szuwalski, R. B. Cabral, D. N. Rader, and A. Leland. 2016. Global  
604 fishery prospects under contrasting management regimes. *Proceedings of the National*  
605 *Academy of Sciences* 113:5125–5129.
- 606 Darling, E. S., T. R. McClanahan, J. Maina, G. G. Gurney, N. A. J. Graham, F. Januchowski-  
607 Hartley, J. E. Cinner, C. Mora, C. C. Hicks, E. Maire, M. Puotinen, W. J. Skirving, M.  
608 Adjeroud, G. Ahmadi, R. Arthur, A. G. Bauman, M. Beger, M. L. Berumen, L. Bigot, J.  
609 Bouwmeester, A. Brenier, T. C. L. Bridge, E. Brown, S. J. Campbell, S. Cannon, B.  
610 Cauvin, C. A. Chen, J. Claudet, V. Denis, S. Donner, Estradivari, N. Fadli, D. A. Feary,  
611 D. Fenner, H. Fox, E. C. Franklin, A. Friedlander, J. Gilmour, C. Goiran, J. Guest, J.-P.  
612 A. Hobbs, A. S. Hoey, P. Houk, S. Johnson, S. D. Jupiter, M. Kayal, C. Kuo, J. Lamb, M.  
613 A. C. Lee, J. Low, N. Muthiga, E. Muttaqin, Y. Nand, K. L. Nash, O. Nedlic, J. M.  
614 Pandolfi, S. Pardede, V. Patankar, L. Penin, L. Ribas-Deulofeu, Z. Richards, T. E.  
615 Roberts, K. S. Rodgers, C. D. M. Safuan, E. Sala, G. Shedrawi, T. M. Sin, P. Smallhorn-  
616 West, J. E. Smith, B. Sommer, P. D. Steinberg, M. Sutthacheep, C. H. J. Tan, G. J.  
617 Williams, S. Wilson, T. Yeemin, J. F. Bruno, M.-J. Fortin, M. Krkosek, and D. Mouillot.  
618 2019. Social–environmental drivers inform strategic management of coral reefs in the  
619 Anthropocene. *Nature Ecology & Evolution*.
- 620 Dudgeon, S., R. Aronson, J. Bruno, and W. Precht. 2010. Phase shifts and stable states on coral  
621 reefs. *Marine Ecology Progress Series* 413:201–216.

- 622 Durrett, R., and S. Levin. 1994. The Importance of Being Discrete (and Spatial). *Theoretical*  
623 *Population Biology* 46:363–394.
- 624 Elmhirst, T., S. R. Connolly, and T. P. Hughes. 2009. Connectivity, regime shifts and the  
625 resilience of coral reefs. *Coral Reefs* 28:949–957.
- 626 Fabina, N. S., M. L. Baskett, and K. Gross. 2015. The differential effects of increasing frequency  
627 and magnitude of extreme events on coral populations. *Ecological Applications* 25:1534–  
628 1545.
- 629 Gibbs, J. W. 1873. A Method of Geometrical Representation of the Thermodynamic Properties  
630 by Means of Surfaces. *Transactions of Connecticut Academy of Arts and Sciences*:382–  
631 404.
- 632 Gordon, H. S. 1954. The Economic Theory of a Common-Property Resource: The Fishery. *The*  
633 *Journal of Political Economy* 62:124–142.
- 634 Graham, N. A. J., S. Jennings, M. A. MacNeil, D. Mouillot, and S. K. Wilson. 2015. Predicting  
635 climate-driven regime shifts versus rebound potential in coral reefs. *Nature* 518:94–97.
- 636 Hirota, M., M. Holmgren, E. H. Van Nes, and M. Scheffer. 2011. Global Resilience of Tropical  
637 Forest and Savanna to Critical Transitions. *Science* 334:232–235.
- 638 Hughes, T. P., M. L. Barnes, D. R. Bellwood, J. E. Cinner, G. S. Cumming, J. B. C. Jackson, J.  
639 Kleypas, I. A. van de Leemput, J. M. Lough, T. H. Morrison, S. R. Palumbi, E. H. van  
640 Nes, and M. Scheffer. 2017. Coral reefs in the Anthropocene. *Nature* 546:82–90.
- 641 Hughes, T. P., J. T. Kerry, S. R. Connolly, A. H. Baird, C. M. Eakin, S. F. Heron, A. S. Hoey, M.  
642 O. Hoogenboom, M. Jacobson, G. Liu, M. S. Pratchett, W. Skirving, and G. Torda. 2019.  
643 Ecological memory modifies the cumulative impact of recurrent climate extremes. *Nature*  
644 *Climate Change* 9:40–43.

- 645 Jiang, J., Z.-G. Huang, T. P. Seager, W. Lin, C. Grebogi, A. Hastings, and Y.-C. Lai. 2018.  
646 Predicting tipping points in mutualistic networks through dimension reduction.  
647 Proceedings of the National Academy of Sciences 115:E639–E647.
- 648 Jokieli, P. L., K. S. Rodgers, E. K. Brown, J. C. Kenyon, G. Aeby, W. R. Smith, and F. Farrell.  
649 2015. Comparison of methods used to estimate coral cover in the Hawaiian Islands. PeerJ  
650 3:e954.
- 651 Knowlton, N. 1992. Thresholds and Multiple Stable States in Coral Reef Community Dynamics.  
652 American Zoologist 32:674–682.
- 653 van de Leemput, I. A., T. P. Hughes, E. H. van Nes, and M. Scheffer. 2016. Multiple feedbacks  
654 and the prevalence of alternate stable states on coral reefs. Coral Reefs 35:857–865.
- 655 Li, X., H. Wang, Z. Zhang, and A. Hastings. 2014. Mathematical analysis of coral reef models.  
656 Journal of Mathematical Analysis and Applications 416:352–373.
- 657 Ling, S. D., R. E. Scheibling, A. Rassweiler, C. R. Johnson, N. Shears, S. D. Connell, A. K.  
658 Salomon, K. M. Norderhaug, A. Perez-Matus, J. C. Hernandez, S. Clemente, L. K.  
659 Blamey, B. Hereu, E. Ballesteros, E. Sala, J. Garrabou, E. Cebrian, M. Zabala, D. Fujita,  
660 and L. E. Johnson. 2014. Global regime shift dynamics of catastrophic sea urchin  
661 overgrazing. Philosophical Transactions of the Royal Society B: Biological Sciences  
662 370:20130269–20130269.
- 663 Lion, S., and M. van Baalen. 2008. Self-structuring in spatial evolutionary ecology. Ecology  
664 Letters 11:277–295.
- 665 Lotka, A. J. 1978. The growth of mixed populations: Two species competing for a common food  
666 supply. Pages 274–286 The Golden Age of Theoretical Ecology: 1923–1940. Springer  
667 Berlin Heidelberg, Berlin, Heidelberg.

- 668 Matsuda, H., N. Ogita, A. Sasaki, and K. Sato. 1992. Statistical Mechanics of Population: The  
669 Lattice Lotka-Volterra Model. *Progress of Theoretical Physics* 88:1035–1049.
- 670 Maxwell, J. C., and P. M. Harman. 1990. The scientific letters and papers of James Clerk  
671 Maxwell. Cambridge University Press, Cambridge [England] ; New York.
- 672 McCann, K., and P. Yodzis. 1995. Bifurcation Structure of a Three-Species Food-Chain Model.  
673 *Theoretical Population Biology* 48:93–125.
- 674 McCook, L., J. Jompa, and G. Diaz-Pulido. 2001. Competition between corals and algae on coral  
675 reefs: a review of evidence and mechanisms. *Coral Reefs* 19:400–417.
- 676 McManus, L. C., J. R. Watson, V. V. Vasconcelos, and S. A. Levin. 2019. Stability and recovery  
677 of coral-algae systems: the importance of recruitment seasonality and grazing influence.  
678 *Theoretical Ecology* 12:61–72.
- 679 Mumby, P. J., A. Hastings, and H. J. Edwards. 2007. Thresholds and the resilience of Caribbean  
680 coral reefs. *Nature* 450:98–101.
- 681 Mumby, P. J., R. S. Steneck, and A. Hastings. 2013. Evidence for and against the existence of  
682 alternate attractors on coral reefs. *Oikos* 122:481–491.
- 683 Nathanson, C. G., C. E. Tarnita, and M. A. Nowak. 2009. Calculating Evolutionary Dynamics in  
684 Structured Populations. *PLoS Computational Biology* 5:e1000615.
- 685 Neuhauser, C., and S. W. Pacala. 1999. An explicitly spatial version of the Lotka-Volterra model  
686 with interspecific competition. *The Annals of Applied Probability* 9:1226–1259.
- 687 Petraitis, P., and C. Hoffman. 2010. Multiple stable states and relationship between thresholds in  
688 processes and states. *Marine Ecology Progress Series* 413:189–200.
- 689 Sandin, S. A., and D. E. McNamara. 2012. Spatial dynamics of benthic competition on coral  
690 reefs. *Oecologia* 168:1079–1090.



- 691 Scheffer, M., S. Carpenter, J. A. Foley, C. Folke, and B. Walker. 2001. Catastrophic shifts in  
692 ecosystems. *Nature* 413:591–596.
- 693 Scheffer, M., and S. R. Carpenter. 2003. Catastrophic regime shifts in ecosystems: linking theory  
694 to observation. *Trends in Ecology & Evolution* 18:648–656.
- 695 Scheffer, M., S. H. Hosper, M.-L. Meijer, B. Moss, and E. Jeppesen. 1993. Alternative equilibria  
696 in shallow lakes. *Trends in Ecology & Evolution* 8:275–279.
- 697 Schmitt, R. J., S. J. Holbrook, S. L. Davis, A. J. Brooks, and T. C. Adam. 2019. Experimental  
698 support for alternative attractors on coral reefs. *Proceedings of the National Academy of*  
699 *Sciences* 116:4372–4381.
- 700 Schröder, A., L. Persson, and A. M. De Roos. 2005. Direct experimental evidence for alternative  
701 stable states: a review. *Oikos* 110:3–19.
- 702 Solow, R. M. 1956. A Contribution to the Theory of Economic Growth. *The Quarterly Journal of*  
703 *Economics* 70:65.
- 704 Staver, A. C., and S. A. Levin. 2012. Integrating Theoretical Climate and Fire Effects on  
705 Savanna and Forest Systems. *The American Naturalist* 180:211–224.
- 706 Steffen, W., K. Richardson, J. Rockstrom, S. E. Cornell, I. Fetzer, E. M. Bennett, R. Biggs, S. R.  
707 Carpenter, W. de Vries, C. A. de Wit, C. Folke, D. Gerten, J. Heinke, G. M. Mace, L. M.  
708 Persson, V. Ramanathan, B. Reyers, and S. Sorlin. 2015. Planetary boundaries: Guiding  
709 human development on a changing planet. *Science* 347:1259855–1259855.
- 710 Tarnita, C. E., H. Ohtsuki, T. Antal, F. Fu, and M. A. Nowak. 2009. Strategy selection in  
711 structured populations. *Journal of Theoretical Biology* 259:570–581.

- 712 Tekwa, E. W., E. P. Fenichel, S. A. Levin, and M. L. Pinsky. 2019a. Path-dependent institutions  
713 drive alternative stable states in conservation. *Proceedings of the National Academy of*  
714 *Sciences* 116:689–694.
- 715 Tekwa, E. W., A. Gonzalez, and M. Loreau. 2015. Local densities connect spatial ecology to  
716 game, multilevel selection and inclusive fitness theories of cooperation. *Journal of*  
717 *Theoretical Biology* 380:414–425.
- 718 Tekwa, E. W., A. Gonzalez, and M. Loreau. 2019b. Spatial evolutionary dynamics produce a  
719 negative cooperation–population size relationship. *Theoretical Population Biology*  
720 125:94–101.
- 721 Tekwa, E. W., D. Nguyen, M. Loreau, and A. Gonzalez. 2017. Defector clustering is linked to  
722 cooperation in a pathogenic bacterium. *Proceedings of the Royal Society B: Biological*  
723 *Sciences* 284:20172001.
- 724 Tilman, D. 1980. Resources: A Graphical-Mechanistic Approach to Competition and Predation.  
725 *The American Naturalist* 116:362–393.
- 726 Verwiebe, F. L. 1939. A P-V-T Diagram of the Allotropic Forms of Ice. *American Journal of*  
727 *Physics* 7:187–189.
- 728 Volterra, V. 1926. Variations and fluctuations of the number of individuals in animal species  
729 living together. *Animal ecology*:409–448.
- 730 van der Waals, J. D. 1873. *Over de Continuïteit van den Gas- en Vloeïstoestand*. Leiden.
- 731 Waters, C. N., J. Zalasiewicz, C. Summerhayes, A. D. Barnosky, C. Poirier, A. Ga uszka, A.  
732 Cearreta, M. Edgeworth, E. C. Ellis, M. Ellis, C. Jeandel, R. Leinfelder, J. R. McNeill, D.  
733 d. Richter, W. Steffen, J. Syvitski, D. Vidas, M. Wagreïch, M. Williams, A. Zhisheng, J.

734 Grinevald, E. Odada, N. Oreskes, and A. P. Wolfe. 2016. The Anthropocene is  
735 functionally and stratigraphically distinct from the Holocene. *Science* 351:aad2622.

736
